# Supplementary material
Source: publisher figshare collection journal article supplement (https://acs.figshare.com/ndownloader/files/17818640)
Supplement: Supplementary file 1 [file 17818640]

## Supporting Information

### **Interpenetration-Enabled Photochromism and Fluorescence Photomodulation in a Metal-Organic Framework with the Thiazolothiazole Extended Viologen Fluorophore**

*Peng Li,<sup>†‡</sup> Meng-Yue Guo,<sup>††‡</sup> Xue-Mei Yin,<sup>†</sup> Lu-Lu Gao,<sup>†</sup> Shuai-Liang Yang,<sup>†</sup> Ran Bu,<sup>†</sup> Teng Gong,<sup>†</sup> En-Qing Gao<sup>\*†</sup>*

<sup>†</sup>Shanghai Key Laboratory of Green Chemistry and Chemical Processes, School of Chemistry and Molecular Engineering, East China Normal University, Shanghai 200062, China.

<sup>††</sup>Engineering Research Center for Nanophotonics and Advanced Instrument, School of Physics and Electronic Science, East China Normal University, Shanghai 200062, China.

\*Email: [egqao@chem.ecnu.edu.cn](mailto:egqao@chem.ecnu.edu.cn)

**Physical Measurements.** Fourier transform infrared (FT-IR) spectra were measured with KBr pellets using a Nicolet NEXUS 670 spectrophotometer. NMR spectroscopy was carried out with a Bruker Advance 400 MHz spectrometer. Carbon, hydrogen, and nitrogen (C H and N) analysis was performed on an Elementar Vario ELIII analyzer. Powder X-ray diffraction (PXRD) patterns were obtained at a scan speed of 10 °C/min using a Rigaku Ultima IV X-ray diffractometer (Cu-K $\alpha$  radiation,  $\lambda = 1.54056 \text{ \AA}$ ). UV-vis spectra were determined on a SHIMADZU UV-2700 spectrometer using finely ground samples coated on BaSO<sub>4</sub> plates. Room-temperature X-band electron spin resonance (ESR) spectroscopy was performed using a Bruker Elexsys 580 spectrometer with a 100 kHz magnetic field.

**Crystal structure determination.** Data collection for **1** was performed at 293 K using a Bruker APEX-II Diffraction diffractometer (Cu-K $\alpha$  radiation,  $\lambda = 1.54184 \text{ \AA}$ ) equipped with a graphite monochromator and a CCD area detector. Structure solution was carried out using the direct method, and full-matrix least-squares refinements were performed on  $F^2$  with the SHELX-2014 program. Non-hydrogen atoms were all refined anisotropically. The H atoms attached to carbons were added geometrically and refined isotropically with the riding model. The H atoms of water molecules were assigned from the difference maps and refined isotropically.

**Photochromic experiments.** Photochromic tests were carried out using a 300W xenon lamp system (CEL-HXUV300, Ceaulight, China) equipped with an IR filter, and the samples was placed at 22 cm from the lamp. The solid-state UV-vis diffusive reflectance and fluorescence spectra were recorded using the same sample after irradiation for the given time.

Table S1. Crystal data and structure refinement for **1**

| <b>1</b>                                             |                                                                                                               |
|------------------------------------------------------|---------------------------------------------------------------------------------------------------------------|
| Empirical formula                                    | C <sub>32</sub> H <sub>24</sub> N <sub>4</sub> O <sub>13</sub> S <sub>2</sub> Cl <sub>2</sub> Cd <sub>2</sub> |
| Formula weight                                       | 1036.40                                                                                                       |
| Crystal system                                       | monoclinic                                                                                                    |
| Space group                                          | <i>P2<sub>1</sub>/c</i>                                                                                       |
| <i>a</i> , Å                                         | 12.979(3)                                                                                                     |
| <i>b</i> , Å                                         | 17.0407(19)                                                                                                   |
| <i>c</i> , Å                                         | 17.367(2)                                                                                                     |
| $\beta$ , deg                                        | 110.474(14)                                                                                                   |
| <i>V</i> , Å <sup>3</sup>                            | 3598.6(10)                                                                                                    |
| <i>Z</i>                                             | 4                                                                                                             |
| $\rho$ calcd, g cm <sup>-3</sup>                     | 1.913                                                                                                         |
| $\mu$ , mm <sup>-1</sup>                             | 12.823                                                                                                        |
| $\theta$ range collected                             | 3.64 to 68.36                                                                                                 |
| <i>S</i> on <i>F</i> <sup>2</sup>                    | 1.121                                                                                                         |
| R <sub>1</sub> [ <i>I</i> > 2 $\sigma$ ( <i>I</i> )] | 0.0485                                                                                                        |
| wR <sub>2</sub> (all data)                           | 0.1456                                                                                                        |

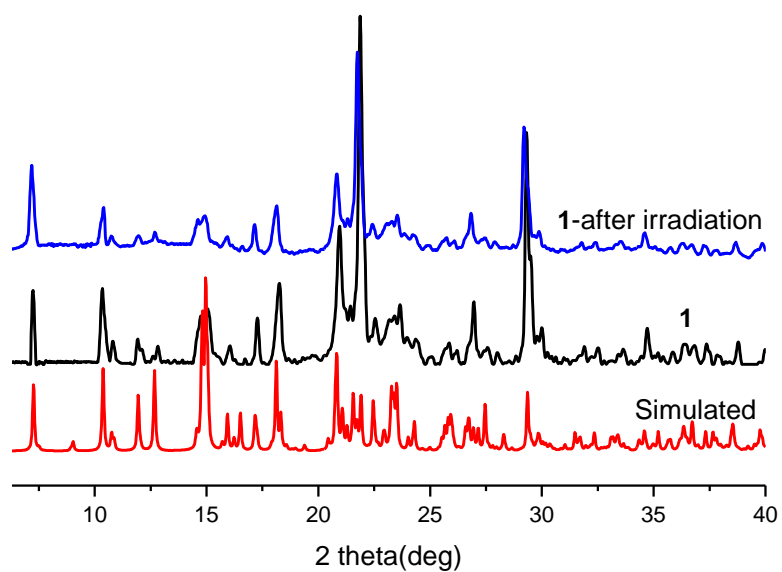

Figure S1. PXRD profiles of **1** before and after Xe light irradiation.

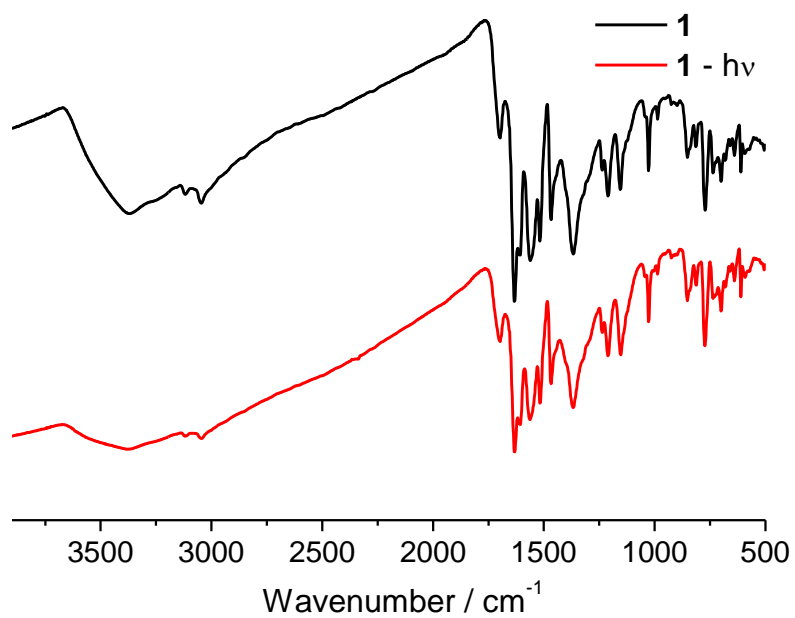

Figure S2. IR spectra of **1** before and after Xe light irradiation.

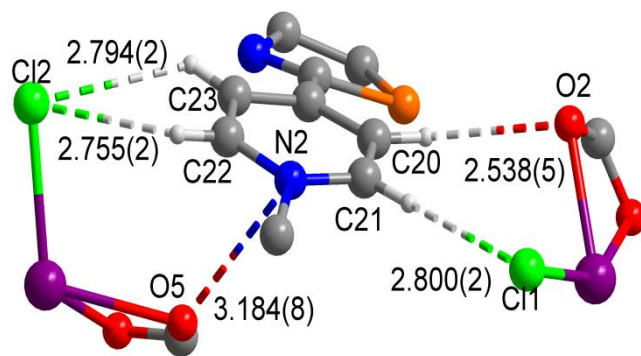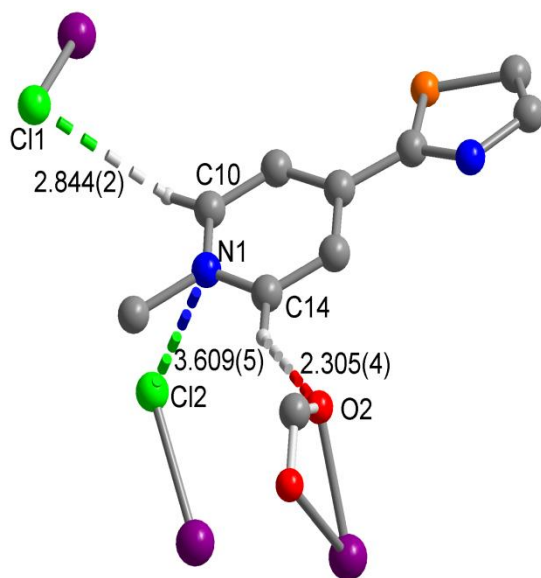

Figure S3. Hydrogen bonds and the  $O_{\text{carboxylate}}/\text{Cl}\cdots\text{N}_{\text{pyridinium}}$  contacts between the interpenetrating frameworks. The distances are given in Å.

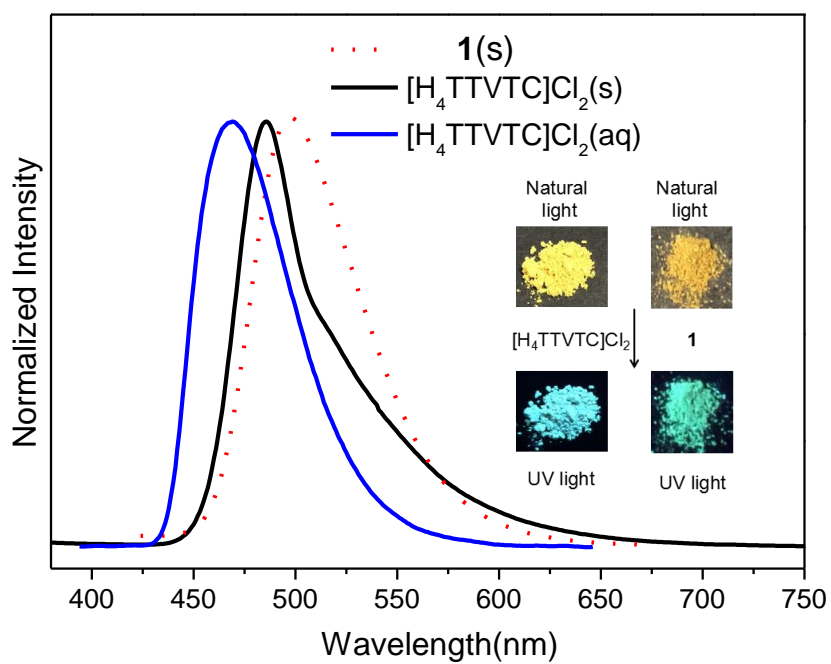

Figure S4. Emission spectra of **1** (solid,  $\lambda_{ex} = 360$  nm) and  $[H_4TTVTC]Cl_2$  (solid,  $\lambda_{ex} = 370$  nm; aqueous solution,  $\lambda_{ex} = 362$  nm). The inset shows the color of the solid samples under natural and UV light.
